# Supplementary material for: Characteristics of antibiotic pollution and assessment of ecological risk of lake water in typical urban landscape in the context of a epidemic
Source: Research Square preprint supplement (doi:10.21203/rs.3.rs-6508163/v1), 2025-05-19
Supplement: Supplementary file 1 [file 24d9009a4ef6a4bcfd7aebcb.docx]

***Supplementary material***

**Characteristics and ecological risk assessment of antibiotic pollution in lake water of typical urban landscape under epidemic situation**

**Text S1.** **Positive matrix factorization model (PMF).**

The Positive Matrix Factorization (PMF) model is a proficient tool for multivariate factor analysis, commonly employed to identify the sources of pollutants (Yu et al. 2016). PMF is capable of handling the inherent uncertainty present in environmental measurements (Wu et al. 2020, Zanotti et al. 2019). The PMF model works by the fact that the user needs to provide documentati on of the concentration and uncertainty of the sample species as well as the number of sources. The model calculates the source profile, the source contribution, and the source profile uncertainty. The results of the PMF model are constrained to ensure positive source contributions and to minimize uncertaintie-weighted differences between observed and predicted species concentrations. This method breakdown the sample concentration data matrixes (X) into a factor contribution matrix (G) and a factor profile matrix (F) while adhering to non-negative constraints. It can be mathematically expressed as follows:

where xij is the concentration matrix of antibiotic j in sample i, gik is the contribution matrix of source k to sample i, fkj is the source profile of antibiotic j for source k, and eij is the residual error matrix of antibiotic j in sample i. It is necessary to find the minimum objective function (Q) to control the residual matrix (E), and PMF can obtain the source contribution through Q:

where uij is the uncertainty of the concentration of antibiotic j in sample i, which is determined according to the concentration of antibiotic (Cij), the relative standard deviation (Error fraction), and the instrumental detection limit (IDL) as follows:

The PMF model was executed using the PMF 5.0 software, adhering to the guidelines provided in the PMF 5.0 Fundamentals and User Guide (US EPA, 2014). The application of PMF 5.0 modeling relies on a trial-and-error method. During the trials, the number of factors was varied between 3 and 7 to determine the optimal number based on the results of DISP, BS, Bootstrap Summary, and the comparison of mapped and unmapped data.

The signal-to-noise ratio (S/N) is an analytical method used to screen data in the running of PMF models, which indicates whether the variability observed in the measurement represents a genuine signal or is merely within the noise of the data. A higher S/N ratio suggests that the variability is more likely to be real and meaningful, while a lower S/N ratio indicates that the observed variation may be attributed to the inherent noise present in the data. S/N can be calculated as:

Where xi, si represent concentration and uncertainty respectively.

Species with concentrations consistently lower than their uncertainty are assigned an S/N of 0, while species with concentrations twice of the uncertainty value are assigned an S/N of 1. S/N greater than 1 often suggests a species with a “good” signal, though this depends on how uncertainties were determined. Using the provided statistics and understanding of analytical and PMF user's guidelines, we categorize S/N < 0.5 as “bad”. A categorization of “Bad” excludes the compound from the rest of the analysis.

By utilizing the provided statistical data, we classify species as "Strong," "Weak," or "Bad" by selecting them in the input data statistics table. We have pinpointed sources of antibiotics in the regional and watershed scales. After several trials, we found that a model with a total of 4 factors performed more effectively in the EPA PMF 5.0 software.

**
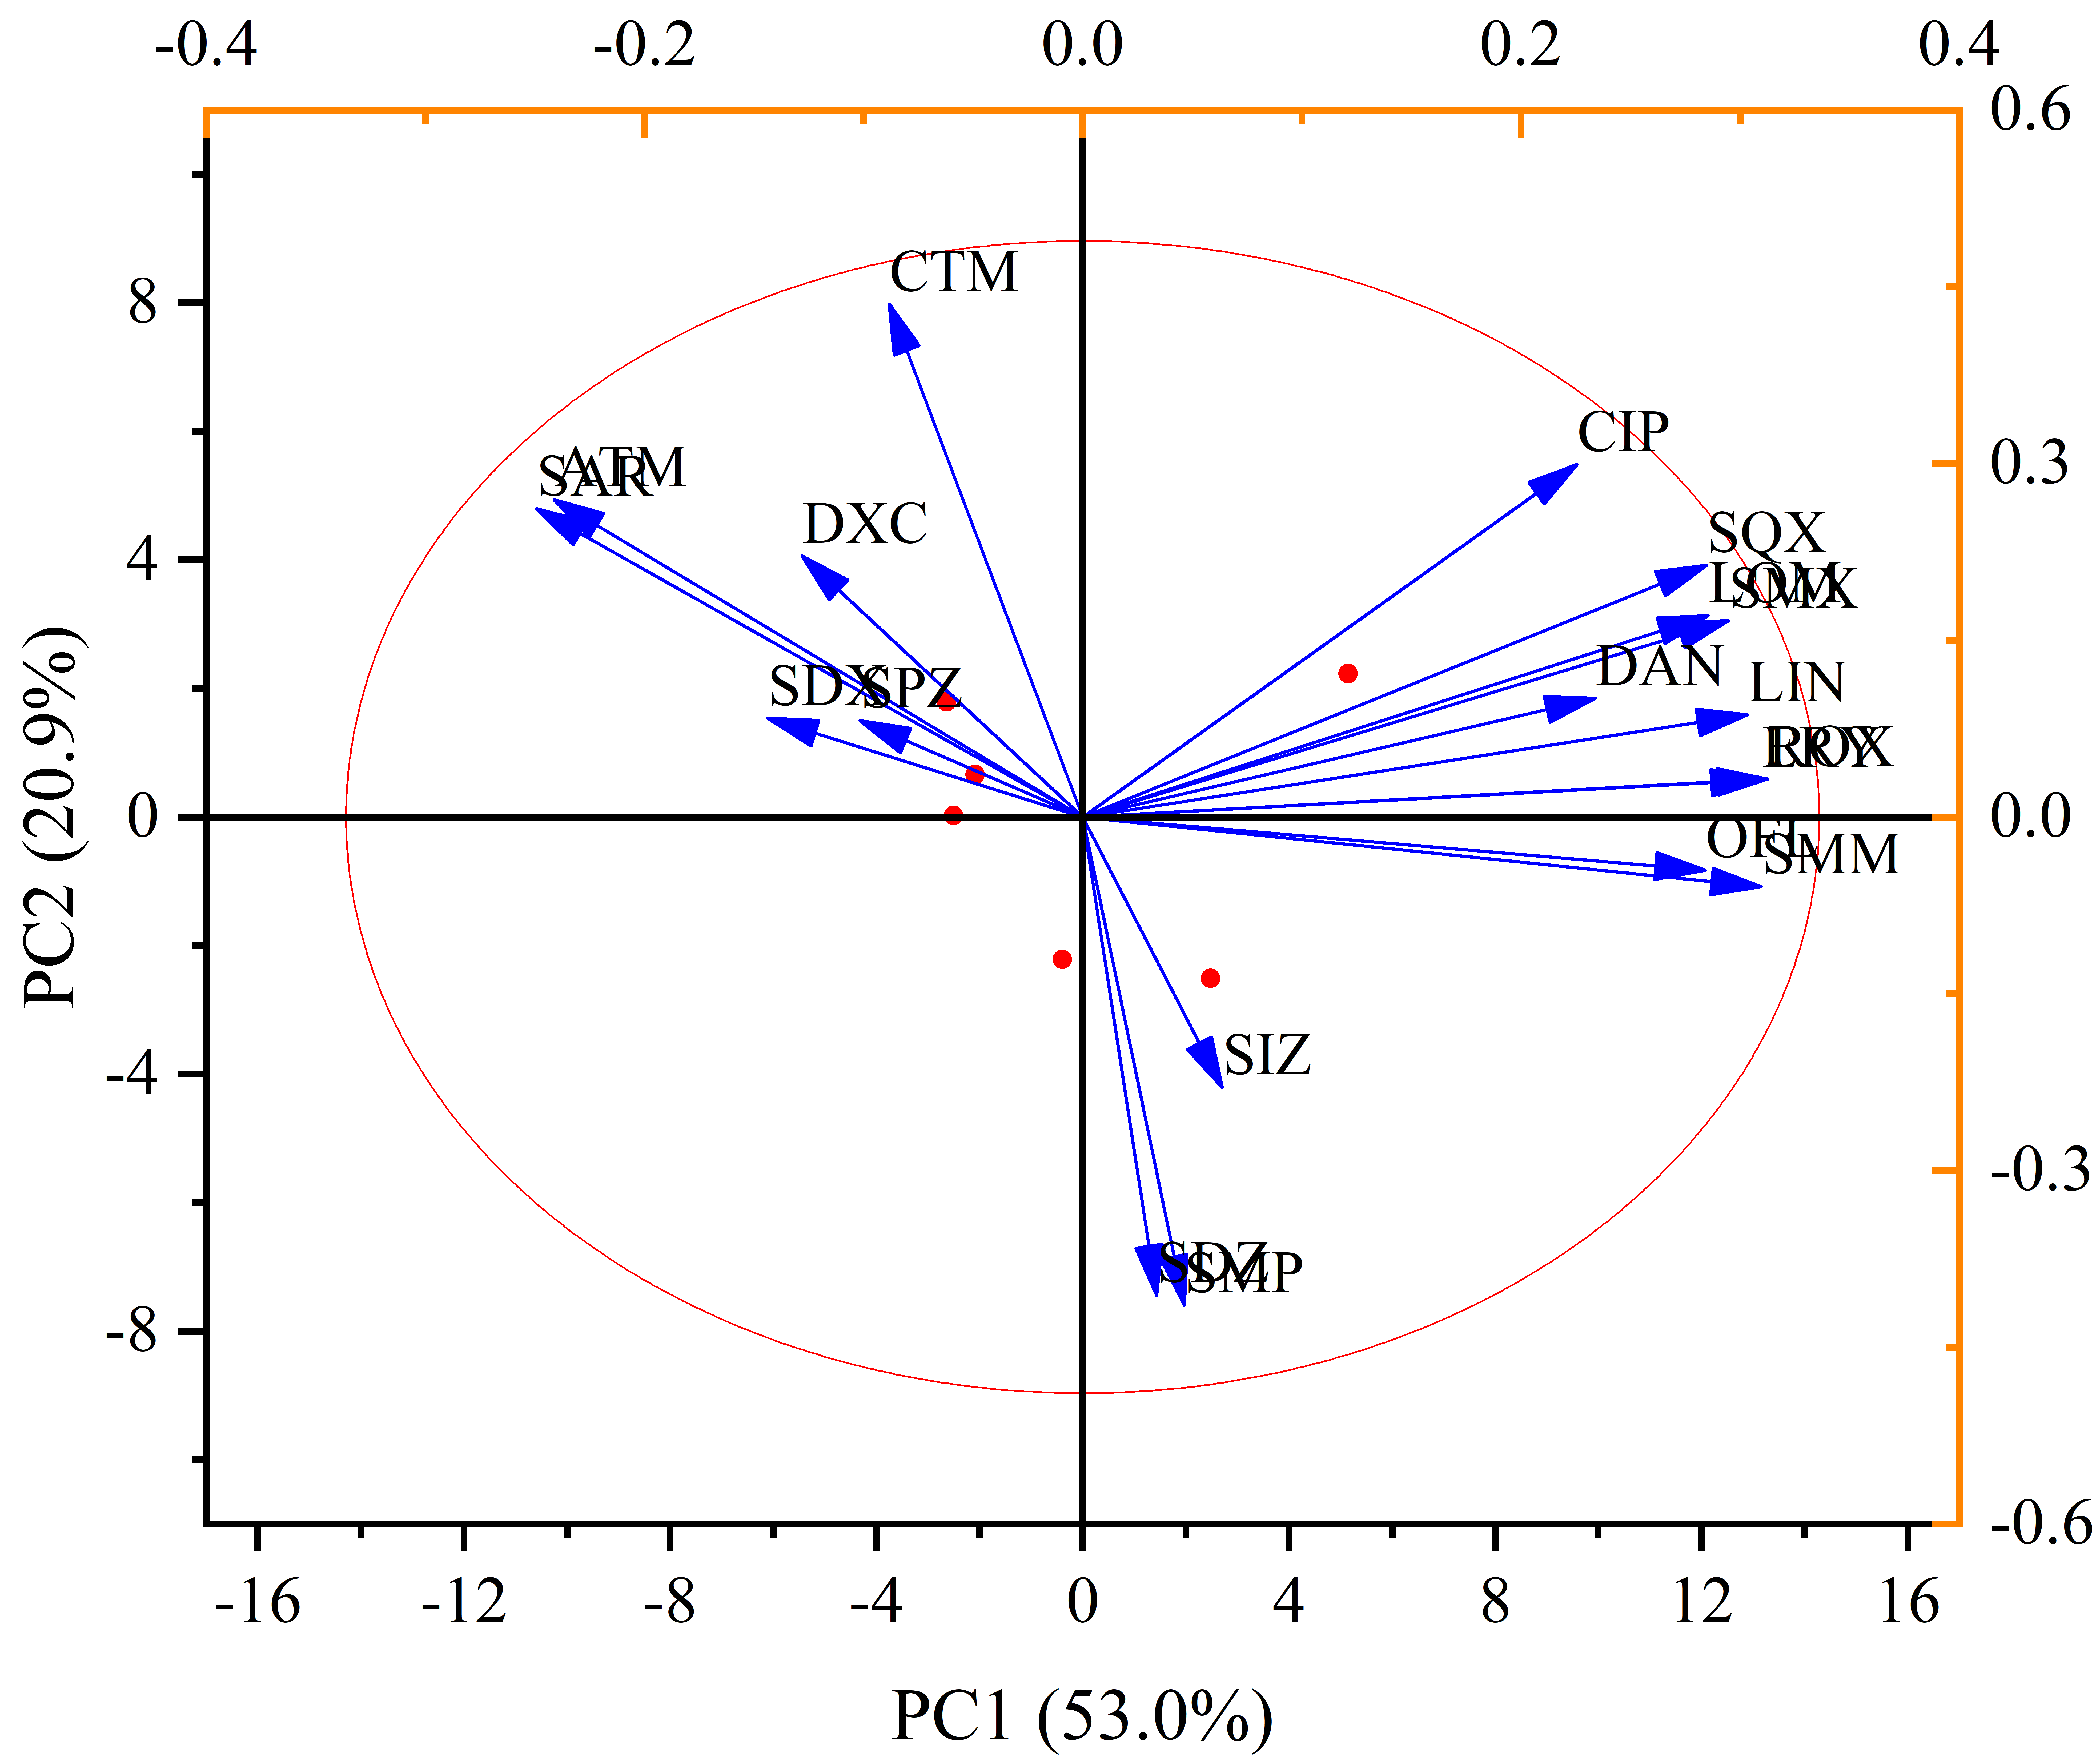
**

**Figure S1. Principal components analysis of concentrations in the study area.**

**Table S1 The antibiotics properties, toxicity data, and usage pattern of the 19 target antibiotics.**

| **Antibiotic Class** | **Antibiotics** | | **Abb.** | **CAS** | **MW** | **Supplier** |
| --- | --- | --- | --- | --- | --- | --- |
| Sulfonamides | | Sulfadiazine | SDZ | 68-35-9 | 250.28 | Dr. Ehrenstorfer |
| Sulfamethoxypyridazine | SMP | 201-272-5 | 280.30 |
| Sulfamethoxazole | SMX | 723-46-6 | 253.28 |
| Sulfisoxazole | SIZ | 127-69-5 | 267.30 |
| Sulfaquinoxaline | SQX | 59-40-5 | 300.34 |
| Sulfadimethoxine | SMM | 122-11-2 | 310.33 |
| sulfadoxine | SDX | 2447-57-6 | 310.33 |
| Sulfaphenazolum | SPZ | 526-08-9 | 314.36 |
| Quinolones | | Ciprofloxacin | CIP | 85721-33-1 | 331.34 | Sigma-Aldrich |
| Ofloxacin | OFL | 82419-36-1 | 361.37 |
| Danofloxacin | DAN | 112398-08-0 | 357.38 |
| Lomefloxacin | LOM | 98079-51-7 | 351.35 |
| Sarafloxacin | SAR | 98105-99-8 | 385.36 |
| Macrolides | | Erythromycin | ERY | 114-07-8 | 733.93 | Dr. Ehrenstorfer |
| Azithromycin | ATM | 83905-01-5 | 748.98 |
| Clarithromycin | CTM | 81103-11-9 | 747.95 |
| Roxithromycin | ROX | 80214-83-1 | 837.05 | Sigma-Aldrich |
| Lincosamides | | Lincomycin | LIN | 154-21-2 | 406.54 | Dr. Ehrenstorfer |
| Tetracyclines | | Doxycycline | DXC | 564-25-0 | 444.43 | Dr. Ehrenstorfer |

**Table S2 The conditions for the mobile phase gradient elution of positive electrospray ionization mode.**

| **Time (min)** | **Acetonitrile (%)** | **0.1% Formic Acid (%) +**  **methanol/ acetonitrile (1:1)** |
| --- | --- | --- |
| 2.0 | 30.0 | 70.0 |
| 5.0 | 40.0 | 60.0 |
| 7.0 | 95.0 | 5.0 |
| 8.5 | 95.0 | 5.0 |
| 8.51 | 15.0 | 85.0 |

# Table S3 Parameters of mass spectrometry in positive and negative electrospray ionization mode for the determination of pharmaceuticals.

|  | **Positive** | **Negative** |
| --- | --- | --- |
| DL temp (℃) | 250 | 250 |
| Atomizing gas flow (l/min) | 3 | 3 |
| Heating gas flow (l/min) | 10 | 10 |
| Sheath gas heater (℃) | 300 | 300 |
| Interface voltage (V) | 4000 | 4000 |
| DUIS corona voltage (V) | 4500 | 4500 |

# Table S4. Parameters of selecting ions and conditions of mass spectrometry in in positive electrospray ionization mode for the determination of pharmaceuticals.

| **Antibiotics** | **Parent ion (Da)** | **Fragment ion (Da)** | **Retention time (min)** | **CE (V)** | **Polarity** |
| --- | --- | --- | --- | --- | --- |
| SDZ | 251.0 | 156.0 | 1.074 | 15 | Positive |
| 92.1 | 25 |
| SMP | 281.0 | 156.0 | 1.938 | 17 | Positive |
| 92.1 | 30 |
| SMX | 254.0 | 156.0 | 2.575 | 16 | Positive |
| 92.0 | 28 |
| SIZ | 268.0 | 156.0 | 1.937 | 13 | Positive |
| 92.1 | 27 |
| SQX | 301.0 | 156.0 | 4.714 | 17 | Positive |
| 92.1 | 30 |
| SMM | 281.0 | 156.0 | 2.243 | 18 | Positive |
| 108.0 | 18 |
| SDX | 311.0 | 156.0 | 4.286 | 26 | Positive |
| 108.0 | 30 |
| SPZ | 315.10 | 158.1 | 3.769 | 28 | Positive |
| 156.1 | 21 |
| OFL | 362.0 | 318.1 | 2.204 | 18 | Positive |
| 261.1 | 28 |
| CIP | 332.2 | 288.1 | 2.501 | 17 | Positive |
| 314.1 | 16 |
| DAN | 358.2 | 340.1 | 2.694 | 20 | Positive |
| 255.0 | 42 |
| LOM | 352.2 | 265.0 | 2.704 | 22 | Positive |
| 308.2 | 16 |
| SAR | 386.2 | 368.1 | 2.990 | 20 | Positive |
| 342.1 | 21 |
| ERY | 750.0 | 87.5 | 4.604 | 35 | Positive |
| 592.4 | 30 |
| ATM | 748.5 | 158.2 | 6.832 | 29 | Positive |
| 590.4 | 21 |
| CTM | 734.3 | 158.2 | 6.595 | 35 | Positive |
| 576.4 | 20 |
| ROX | 837.5 | 158.2 | 6.853 | 40 | Positive |
| 679.4 | 25 |
| LIN | 407.3 | 126.1 | 1.573 | 40 | Positive |
| 359.3 | 20 |
| DXC | 445.2 | 428.2 | 2.223 | 16 | Positive |
| 154.1 | 34 |

**Table S5. The instrument limitation and validation data.**

| **Antibiotics Type** | **IDL (ng/mL)** | **IQL (ng/mL)** | **Recovery (%)** | **Linearity** | |
| --- | --- | --- | --- | --- | --- |
| **R2** | |
| SDZ | 0.2 | 0.67 | 97.2 | 0.9993 |
| SMP | 0.2 | 0.67 | 86.3 | 0.9993 |
| SMX | 0.2 | 0.67 | 98.4 | 0.9998 |
| SIZ | 0.2 | 0.67 | 91.3 | 0.9997 |
| SQX | 0.2 | 0.67 | 77.4 | 0.9999 |
| SMM | 0.2 | 0.67 | 87.5 | 0.9995 |
| SDX | 0.2 | 0.67 | 89.1 | 0.9994 |
| SPZ | 0.2 | 0.67 | 90.6 | 0.9993 |
| OFL | 1.0 | 3.33 | 90.2 | 0.9997 |
| CIP | 1.0 | 3.33 | 82.4 | 0.9993 |
| DAN | 1.0 | 3.33 | 93.3 | 0.9995 |
| LOM | 1.0 | 3.33 | 76.8 | 0.9997 |
| SAR | 1.0 | 3.33 | 83.1 | 0.9998 |
| ATM | 0.5 | 1.67 | 83.8 | 0.9994 |
| CTM | 0.5 | 1.67 | 84.1 | 0.9995 |
| ERY | 1.0 | 3.33 | 64.6 | 0.9996 |
| ROX | 0.5 | 1.67 | 85.7 | 0.9995 |
| LIN | 0.5 | 1.67 | 75.0 | 0.9995 |
| DXC | 1.0 | 3.33 | 65.9 | 0.9995 |

IDL: instrumental detection limit

IQL: instrumental quantification limit

**Table S6 Risk quotients (RQs) for the aquatic organisms as calculated from measured environmental concentrations (MECs) and predicted no effect concentrations (PNECs).**

| **Antibiotics** | **Taxonomic group** | **E(L)C50** | **N(L)OEC** | **AF** | **PNEC**  **(ng/L)** |
| --- | --- | --- | --- | --- | --- |
| SDZ | Algae | 28.99 |  | 1000 | 28990 |
| Crustacean | 0.1 |  | 1000 | 100 |
| Fish | 23.83 |  | 1000 | 23830 |
| SMX | Algae | 0.027 |  | 1000 | 27 |
| Crustacean |  | 0.25 | 10 | 25000 |
| Fish |  | 8 | 10 | 800000 |
| SIZ | Algae | 18.98 |  | 1000 | 18980 |
| SMM | Algae | 1.277 |  | 1000 | 1277 |
| Crustacean | 14.9 |  | 1000 | 14900 |
| SQX | Algae | 0.246 |  | 1000 | 246 |
| OFL | Algae | 0.021 |  | 1000 | 21 |
| Crustacean |  | 10 | 50 | 200000 |
| Fish |  | 10 | 10 | 1000000 |
| Invertebrates | 17.41 |  | 1000 | 17410 |
| Plants | 0.126 |  | 1000 | 126 |
| CIP | Algae | 0.017 |  | 1000 | 17 |
| Crustacean |  | 1.8 | 10 | 180000 |
| Fish |  | 100 | 10 | 10000000 |
| Plants | 0.203 |  | 1000 | 203 |
| LOM | Algae | 0.186 |  | 1000 | 186 |
| ATM | Algae | 1.87 |  | 1000 | 1870 |
| Crustacean | 0.29 |  | 1000 | 290 |
| Fish | 18.82 |  | 1000 | 18820 |
| CTM | Algae | 0.76 |  | 1000 | 760 |
| Crustacean | 0.31 |  | 1000 | 310 |
| Fish | 0.93 |  | 1000 | 930 |
| ERY | Algae | 0.02 |  | 1000 | 20 |
| Crustacean | 9 |  | 1000 | 9000 |
| Fish | 6.8 |  | 1000 | 68000 |
| Invertebrates | 0.94 |  | 1000 | 940 |
| Plants | 1 |  | 1000 | 1000 |
| ROX | Algae | 0.0043 |  | 1000 | 4.3 |
| Crustacean | 0.6 |  | 1000 | 600 |
| Fish | 2.3 |  | 1000 | 2300 |
| Invertebrates | 7.1 |  | 1000 | 7100 |
| Plants | 10 |  | 1000 | 10000 |
| LIN | Algae | 1.44 |  |  | 1440 |
| Invertebrates | 50 |  | 100 | 500000 |
| DXC | Algae | 2.2 |  | 1000 | 2200 |

Note: PNE and EC50data were cited from previous reports (Fan et al. 2025, Han et al. 2023, Huang et al. 2019, Ling et al. 2023, Liu et al. 2025, Sonkar et al. 2024, Wei et al. 2024).

**Table S7. Total variance explained by principal components.**

| **Principal component** | **Charactor value** | **Percentage of**  **Variance (%)** | **Cumulative variance contribution rate (%)** | |
| --- | --- | --- | --- | --- |
| 1 | 10.075 | 53.025 | | 53.025 |
| 2 | 3.967 | 20.877 | | 73.902 |
| 3 | 3.538 | 18.620 | | 92.522 |
| 4 | 1.026 | 5.398 | | 97.920 |
| 5 | 0.395 | 2.080 | | 100 |
| 6 | 1.679E-31 | 8.834E-31 | | 100 |

**Reference**

Fan, W., Yang, M., Shao, Y., Shen, D., Ao, L. and Chen, Z. (2025) Integrated social development on analyzing the distribution, risk and source apportionment of antibiotics pollution in mountainous rivers. Water Research X. 28, 100327-100327.

Han, J., Ling, L., Xuemei, L., Yao, W., Lei, L., Yew-Hoong, G.K., Guangxin, Z. and Jingjie, Z. (2023) A comprehensive study of the source, occurrence, and spatio-seasonal dynamics of 12 target antibiotics and their potential risks in a cold semi-arid catchment. Water Research. 229, 119433-119433.

Huang, F., Zou, S., Deng, D., Lang, H. and Liu, F. (2019) Antibiotics in a typical karst river system in China: Spatiotemporal variation and environmental risks. Science of the Total Environment. 650(P1), 1348-1355.

Ling, Z., Junhong, B., Kegang, Z., Yujia, Z., Yaqi, W., Haizhu, L., Rong, X., A., J.M. and Jiangbao, X. (2023) Spatial variability, source identification and risks assessment of antibiotics in multimedia of North China's largest freshwater lake using positive matrix factorization and Monte Carlo simulation. Journal of Hazardous Materials. 457, 131751-131751.

Liu, R., Liu, L., Liu, Y. and Wang, L. (2025) Comprehensive evaluation of antibiotic pollution in a typical tributary of the Yellow River, China: Source-specific partitioning and fate analysis. Journal of Hazardous Materials. 488, 137294-137294.

Sonkar, V., Venu, V., Nishil, B. and Thatikonda, S. (2024) Review on antibiotic pollution dynamics: insights to occurrence, environmental behaviour, ecotoxicity, and management strategies. Environmental science and pollution research international. 31(39), 1-33.

Wei, C., Wang, Y., Zhang, R., Liu, F., Zhang, Z.E., Wang, J. and Yu, K. (2024) Spatiotemporal distribution and potential risks of antibiotics in coastal water of Beibu Gulf, South China Sea: Livestock and poultry emissions play essential effect. Journal of Hazardous Materials. 466, 133550-.

Wu, J., Li, J., Teng, Y., Chen, H. and Wang, Y. (2020) A partition computing-based positive matrix factorization (PC-PMF) approach for the source apportionment of agricultural soil heavy metal contents and associated health risks. Journal of Hazardous Materials. 388(prepublish), 121766.

Yu, W., Liu, R., Xu, F., Men, C. and Shen, Z. (2016) Identifications and seasonal variations of sources of polycyclic aromatic hydrocarbons (PAHs) in the Yangtze River Estuary, China. Marine Pollution Bulletin. 104(1-2), 347-354.

Zanotti, C., Rotiroti, M., Fumagalli, L., Stefania, G.A., Canonaco, F., Stefenelli, G., Prévôt, A.S.H., Leoni, B. and Bonomi, T. (2019) Groundwater and surface water quality characterization through positive matrix factorization combined with GIS approach. Water Research. 159, 122-134.
